# Supplementary material
Source: PubMed Central journal article supplement (PMC8221757)
Supplement: sj-pdf-1-jcb-10.1177_0271678X20965500.pdf [file sj-pdf-1-jcb-10.1177_0271678X20965500.pdf]

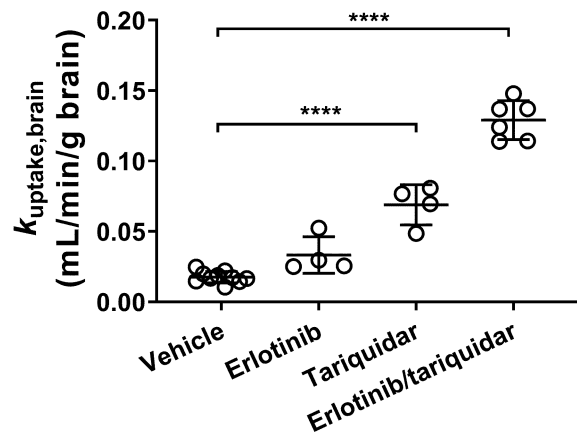

**Supplementary Figure 1.**  $k_{\text{uptake,brain}}$  values for all examined mouse groups. \*\*\*\*,  $p < 0.0001$ , 1-way ANOVA with Dunnett's multiple comparisons test.

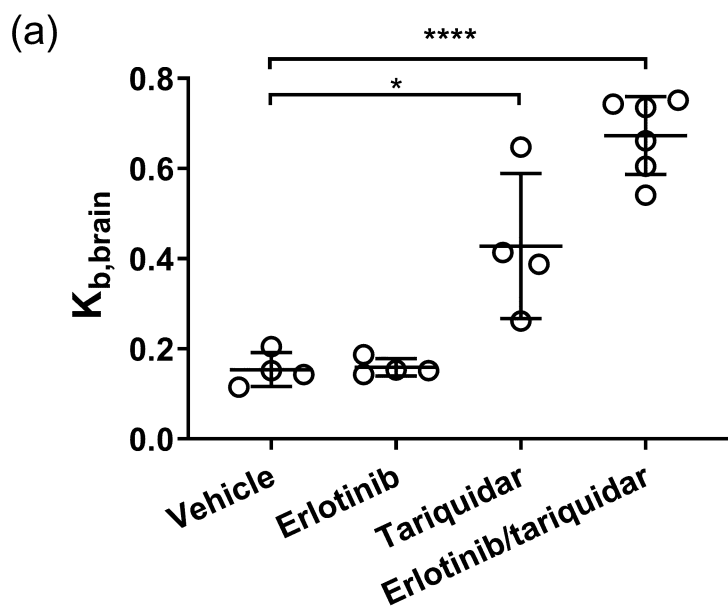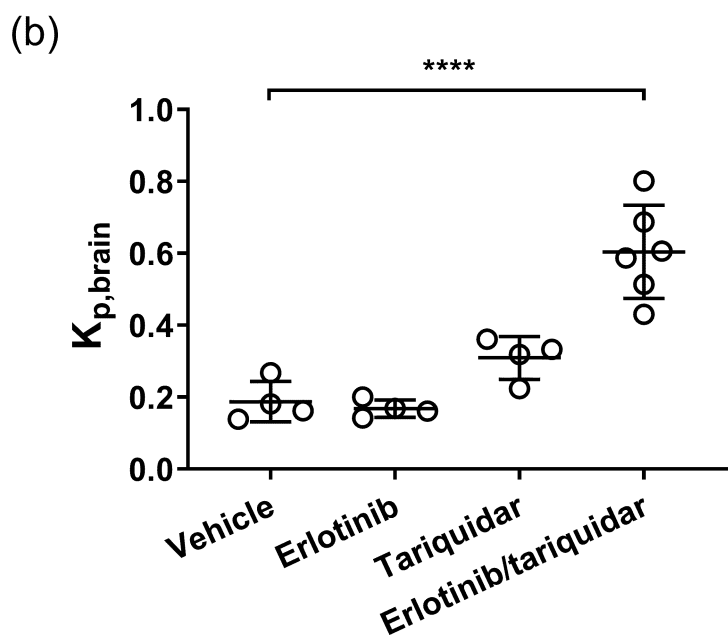

**Supplementary Figure 2.**  $K_{b,brain}$  values (a) and  $K_{p,brain}$  values (b) for all examined mouse groups. \*,  $p < 0.05$ ; \*\*\*\*,  $p < 0.0001$ , 1-way ANOVA with Dunnett's multiple comparisons test.

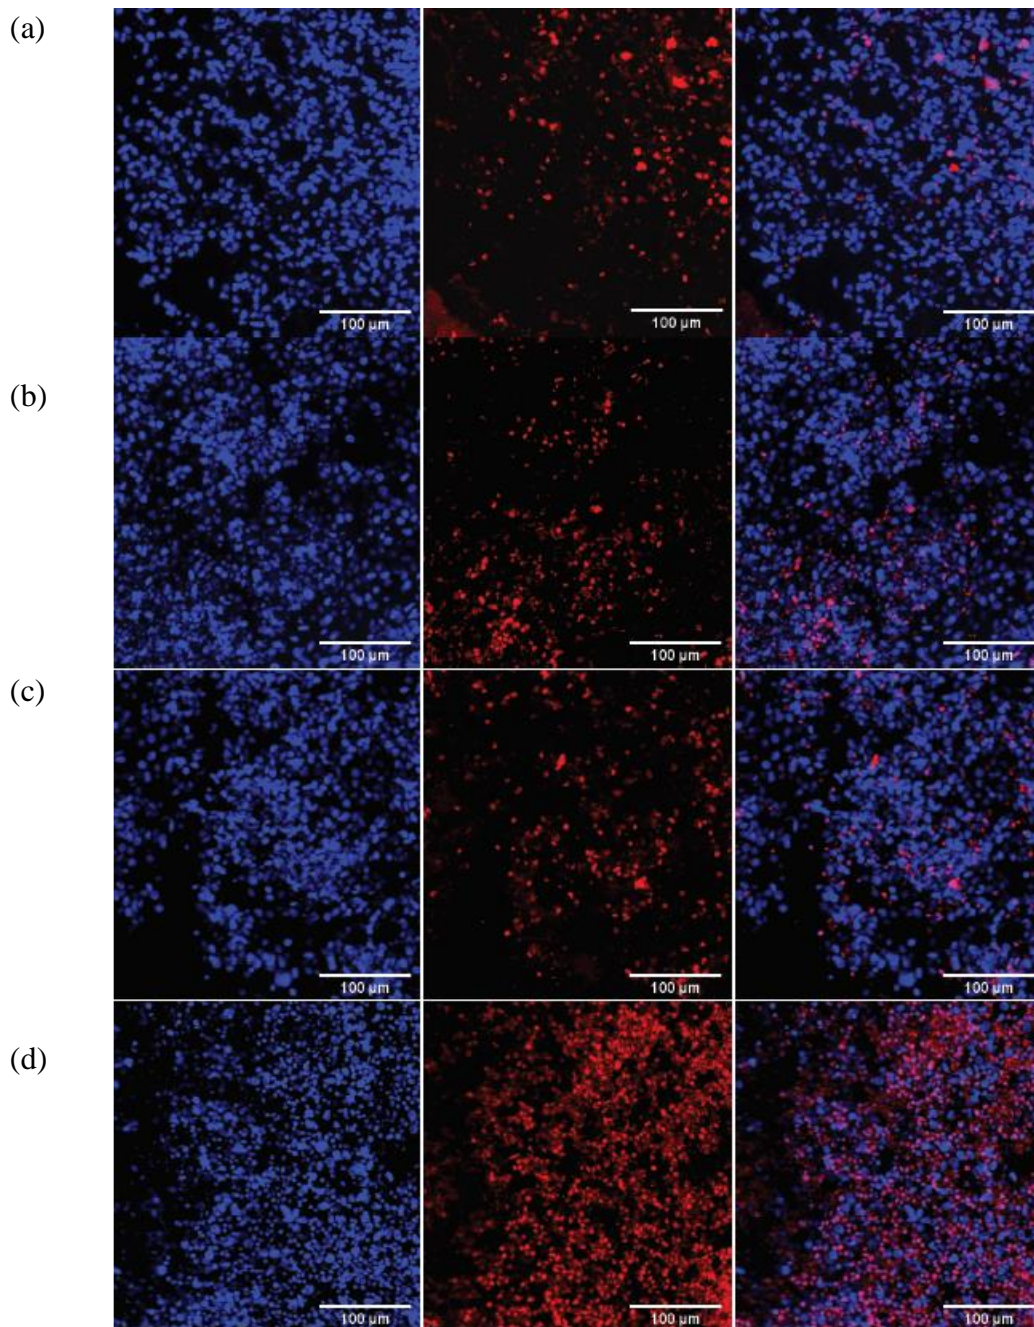

**Supplementary Figure 3.** Staining of sections prepared from hESC-derived cerebral organoids incubated for 24 hours with medium containing (a) 0.1% DMSO, (b) erlotinib hydrochloride (10  $\mu\text{g}/\text{mL}$ ), (c) tariquidar dimesylate (5  $\mu\text{g}/\text{mL}$ ) and (d) a combination of erlotinib hydrochloride (10  $\mu\text{g}/\text{mL}$ ) and tariquidar dimesylate (5  $\mu\text{g}/\text{mL}$ ). Left column shows nuclear staining with Hoechst 33342 dye, middle column staining with Caspase-3 antibody and right column colocalization of Hoechst 33342 and Caspase-3 staining (scale bar = 100  $\mu\text{m}$ ).
